# Supplementary material for: Protocol for scoping review on well-being among theatre nurses in large public hospitals in low-income and middle-income countries
Source: HighWire-hosted journal article supplement (doi:10.1136/bmjopen-2021-057600), 2022-04-01
Supplement: bmjopen-2021-057600supp001_data_supplement.pdf [file bmjopen-2021-057600supp001_data_supplement.pdf]

## Appendix 1

PubMed – Initial Search

#33

Search: (((((well-being OR "well being" OR wellbeing OR quality-of-life OR "quality of life")) OR ("Quality of Life"[Mesh])) AND (((state hospital OR state hospitals OR government hospital OR government hospitals OR public hospital OR public hospitals OR national hospital OR national hospitals)) OR ("Hospitals, State"[Mesh]))) AND (((theater nurse OR theater nurses OR theatre nurse OR theatre nurses OR surgical nurse OR surgical nurses)) OR ("Operating Room Nursing"[Mesh])) OR ((operating room nurse OR operating room nurses))) AND (((("Developing Countries"[Mesh]) OR (Afghanistan OR Albania OR Algeria OR American Samoa OR Angola OR Armenia OR Azerbaijan OR Bangladesh OR Belarus OR Byelarus OR Belorussia OR Belize OR Benin OR Bhutan OR Bolivia OR Bosnia OR Botswana OR Brazil OR Bulgaria OR Burma OR Burkina Faso OR Burundi OR Cabo Verde OR Cape Verde OR Cambodia OR Cameroon OR Central African Republic OR Chad OR China OR Colombia OR Comoros OR Comores OR Comoro OR Congo OR Costa Rica OR Côte d'Ivoire OR Cuba OR Djibouti OR Dominica OR Dominican Republic OR Ecuador OR Egypt OR El Salvador OR Equatorial Guinea OR Eritrea OR Ethiopia OR Fiji OR Gabon OR Gambia OR Gaza OR Georgia OR Georgia Republic OR Ghana OR Grenada OR Grenadines OR Guatemala OR Guinea OR Guinea- Bissau OR Guyana OR Haiti OR Herzegovina OR Hercegovina OR Honduras OR India OR Indonesia OR Iran OR Iraq OR Ivory Coast OR Jamaica OR Jordan OR Kazakhstan OR Kenya OR Kiribati OR Democratic People's Republic of Korea OR Kosovo OR Kyrgyz OR Kirghizia OR Kirghiz OR Kyrgyzstan OR Lao PDR OR Laos OR Lebanon OR Lesotho OR Liberia OR Libya OR Macedonia OR Madagascar OR Malawi OR Malay OR Malaya OR Malaysia OR Maldives OR Mali OR Marshall Islands OR Mauritania OR Mauritius OR Mexico OR Micronesia OR Moldova OR Mongolia OR Montenegro OR Morocco OR Mozambique OR Myanmar OR Namibia OR Nepal OR Nicaragua OR Niger OR Nigeria OR Pakistan OR Palau OR Papua New Guinea OR Paraguay OR Peru OR Philippines OR Principe OR Romania OR Ruanda OR Rwanda OR Samoa OR Sao Tome OR Senegal OR Serbia OR Sierra Leone OR Solomon Islands OR Somalia OR South Africa OR South Sudan OR Sri Lanka OR St Lucia OR St Vincent OR Sudan OR Surinam OR Suriname OR Swaziland OR Syria OR Syrian Arab Republic OR Tajikistan OR Tadjhikistan OR Tajikistan OR Tadjhik OR Tanzania OR Thailand OR Timor OR Togo OR Tonga OR Tunisia OR Turkey OR Turkmen OR Turkmenistan OR Tuvalu OR Uganda OR Ukraine OR Uzbek OR Uzbekistan OR Vanuatu OR Venezuela OR Vietnam OR West Bank OR Yemen OR Zambia OR Zimbabwe)) OR (Deprived Countries OR Deprived Population OR Deprived Populations OR Developing Countries OR Developing Country OR Developing Economies OR Developing Economy OR Developing Nation OR Developing Nations OR Developing Population OR Developing Populations OR Developing World OR LAMI Countries OR LAMI Country OR Less Developed Countries OR Less Developed Country OR Less Developed Economies OR Less Developed Nation OR Less Developed Nations OR Less Developed World OR Lesser Developed Countries OR Lesser Developed Nations OR LMIC OR LMICS OR Low GDP OR Low GNP OR Low Gross Domestic OR Low Gross National OR Low Income OR Lower GDP OR lower gross domestic OR Lower Income OR Middle Income OR Poor Countries OR Poor Country OR Poor Economies OR Poor Economy OR Poor Nation OR Poor Nations OR Poor Population OR Poor Populations OR poor world OR Poorer Countries OR Poorer Economies OR Poorer Economy OR Poorer Nations OR Poorer Population OR Poorer Populations OR Third World OR Transitional Countries OR Transitional Country OR Transitional Economies OR Transitional Economy OR Under Developed Countries OR Under Developed Country OR under developed nations OR Under Developed World OR Under Served Population OR Under Served Populations OR

Underdeveloped Countries OR Underdeveloped Country OR underdeveloped economies OR underdeveloped nations OR underdeveloped population OR Underdeveloped World OR Underserved Countries OR Underserved Nations OR Underserved Population OR Underserved Populations))

1,157 05:49:45

#32

Search: (((((((theater nurse OR theater nurses OR theatre nurse OR theatre nurses OR surgical nurse OR surgical nurses)) OR ("Operating Room Nursing"[Mesh])) OR ((operating room nurse OR operating room nurses))) AND (((well-being OR "well being" OR wellbeing OR quality-of-life OR "quality of life")) OR ("Quality of Life"[Mesh])) AND ((tool OR tools OR measuring OR measurement OR measurements OR instrument OR instruments)))) AND (((state hospital OR state hospitals OR government hospital OR government hospitals OR public hospital OR public hospitals OR national hospital OR national hospitals)) OR ("Hospitals, State"[Mesh])) AND (((("Developing Countries"[Mesh]) OR (Afghanistan OR Albania OR Algeria OR American Samoa OR Angola OR Armenia OR Azerbaijan OR Bangladesh OR Belarus OR Byelarus OR Belorussia OR Belize OR Benin OR Bhutan OR Bolivia OR Bosnia OR Botswana OR Brazil OR Bulgaria OR Burma OR Burkina Faso OR Burundi OR Cabo Verde OR Cape Verde OR Cambodia OR Cameroon OR Central African Republic OR Chad OR China OR Colombia OR Comoros OR Comores OR Comoro OR Congo OR Costa Rica OR Côte d'Ivoire OR Cuba OR Djibouti OR Dominica OR Dominican Republic OR Ecuador OR Egypt OR El Salvador OR Equatorial Guinea OR Eritrea OR Ethiopia OR Fiji OR Gabon OR Gambia OR Gaza OR Georgia OR Georgia Republic OR Ghana OR Grenada OR Grenadines OR Guatemala OR Guinea OR Guinea- Bissau OR Guyana OR Haiti OR Herzegovina OR Hercegovina OR Honduras OR India OR Indonesia OR Iran OR Iraq OR Ivory Coast OR Jamaica OR Jordan OR Kazakhstan OR Kenya OR Kiribati OR Democratic People's Republic of Korea OR Kosovo OR Kyrgyz OR Kirghizia OR Kirghiz OR Kyrgyzstan OR Lao PDR OR Laos OR Lebanon OR Lesotho OR Liberia OR Libya OR Macedonia OR Madagascar OR Malawi OR Malay OR Malaya OR Malaysia OR Maldives OR Mali OR Marshall Islands OR Mauritania OR Mauritius OR Mexico OR Micronesia OR Moldova OR Mongolia OR Montenegro OR Morocco OR Mozambique OR Myanmar OR Namibia OR Nepal OR Nicaragua OR Niger OR Nigeria OR Pakistan OR Palau OR Papua New Guinea OR Paraguay OR Peru OR Philippines OR Principe OR Romania OR Ruanda OR Rwanda OR Samoa OR Sao Tome OR Senegal OR Serbia OR Sierra Leone OR Solomon Islands OR Somalia OR South Africa OR South Sudan OR Sri Lanka OR St Lucia OR St Vincent OR Sudan OR Surinam OR Suriname OR Swaziland OR Syria OR Syrian Arab Republic OR Tajikistan OR Tadjikistan OR Tajikistan OR Tadjik OR Tanzania OR Thailand OR Timor OR Togo OR Tonga OR Tunisia OR Turkey OR Turkmen OR Turkmenistan OR Tuvalu OR Uganda OR Ukraine OR Uzbek OR Uzbekistan OR Vanuatu OR Venezuela OR Vietnam OR West Bank OR Yemen OR Zambia OR Zimbabwe)) OR (Deprived Countries OR Deprived Population OR Deprived Populations OR Developing Countries OR Developing Country OR Developing Economies OR Developing Economy OR Developing Nation OR Developing Nations OR Developing Population OR Developing Populations OR Developing World OR LAMI Countries OR LAMI Country OR Less Developed Countries OR Less Developed Country OR Less Developed Economies OR Less Developed Nation OR Less Developed Nations OR Less Developed World OR Lesser Developed Countries OR Lesser Developed Nations OR LMIC OR LMICS OR Low GDP OR Low GNP OR Low Gross Domestic OR Low Gross National OR Low Income OR Lower GDP OR lower gross domestic OR Lower Income OR Middle Income OR Poor Countries OR Poor Country OR Poor Economies OR Poor Economy OR Poor Nation OR Poor Nations OR Poor Population OR Poor Populations OR poor world OR Poorer Countries OR Poorer Economies OR Poorer Economy OR Poorer Nations OR Poorer Population OR Poorer Populations OR Third World

OR Transitional Countries OR Transitional Country OR Transitional Economies OR Transitional Economy OR Under Developed Countries OR Under Developed Country OR under developed nations OR Under Developed World OR Under Served Population OR Under Served Populations OR Underdeveloped Countries OR Underdeveloped Country OR underdeveloped economies OR underdeveloped nations OR underdeveloped population OR Underdeveloped World OR Underserved Countries OR Underserved Nations OR Underserved Population OR Underserved Populations))

388 05:46:22

#31

Search: (((((theater nurse OR theater nurses OR theatre nurse OR theatre nurses OR surgical nurse OR surgical nurses)) OR ("Operating Room Nursing"[Mesh])) OR ((operating room nurse OR operating room nurses))) AND (((well-being OR "well being" OR wellbeing OR quality-of-life OR "quality of life") OR ("Quality of Life"[Mesh])) AND ((tool OR tools OR measuring OR measurement OR measurements OR instrument OR instruments)))) AND (((state hospital OR state hospitals OR government hospital OR government hospitals OR public hospital OR public hospitals OR national hospital OR national hospitals)) OR ("Hospitals, State"[Mesh]))

1,116 05:45:12

#30

Search: ((state hospital OR state hospitals OR government hospital OR government hospitals OR public hospital OR public hospitals OR national hospital OR national hospitals)) OR ("Hospitals, State"[Mesh])

1,134,909 05:44:33

#29

Search: "Hospitals, State"[Mesh] Sort by: Most Recent

2,194 05:44:19

#28

Search: (state hospital OR state hospitals OR government hospital OR government hospitals OR public hospital OR public hospitals OR national hospital OR national hospitals)

1,134,909 05:43:57

#27

Search: (((well-being OR "well being" OR wellbeing OR quality-of-life OR "quality of life") OR ("Quality of Life"[Mesh])) AND ((tool OR tools OR measuring OR measurement OR measurements OR instrument OR instruments)))

1,809,423 05:41:53

#26

Search: (tool OR tools OR measuring OR measurement OR measurements OR instrument OR instruments)

5,202,607 05:38:32

#25

Search: ((well-being OR "well being" OR wellbeing OR quality-of-life OR "quality of life")) OR ("Quality of Life"[Mesh])

7,959,606 05:37:27

#24

Search: "Quality of Life"[Mesh] Sort by: Most Recent

209,127 05:37:15

#23

Search: (well-being OR "well being" OR wellbeing OR quality-of-life OR "quality of life")

7,959,606 05:36:41

#22

Search: (((theater nurse OR theater nurses OR theatre nurse OR theatre nurses OR surgical nurse OR surgical nurses)) OR ("Operating Room Nursing"[Mesh])) OR ((operating room nurse OR operating room nurses))

38,682 05:34:39

#21

Search: (operating room nurse OR operating room nurses)

5,112 05:34:29

#20

Search: "Operating Room Nursing"[Mesh] Sort by: Most Recent

6,069 05:34:01

#19

Search: (theater nurse OR theater nurses OR theatre nurse OR theatre nurses OR surgical nurse OR surgical nurses)

32,743
