# Supplementary material for: Protocol for scoping review on well-being among theatre nurses in large public hospitals in low-income and middle-income countries
Source: HighWire-hosted journal article supplement (doi:10.1136/bmjopen-2021-057600), 2022-04-01
Supplement: bmjopen-2021-057600supp004_data_supplement.pdf [file bmjopen-2021-057600supp004_data_supplement.pdf]

## JBI template source of evidence details, characteristics and results extraction instrument

|                                                                                                             |  |
|-------------------------------------------------------------------------------------------------------------|--|
| <b>Scoping Review Details</b>                                                                               |  |
| Scoping Review title:                                                                                       |  |
| Review objective/s:                                                                                         |  |
| Review question/s:                                                                                          |  |
| <b>Inclusion/Exclusion Criteria</b>                                                                         |  |
| Population                                                                                                  |  |
| Concept                                                                                                     |  |
| Context                                                                                                     |  |
| Types of evidence source                                                                                    |  |
| <b>Evidence source Details and Characteristics</b>                                                          |  |
| Citation details (e.g. author/s, date, title, journal, volume, issue, pages)                                |  |
| Country                                                                                                     |  |
| Context                                                                                                     |  |
| Participants (details e.g. age/sex and number)                                                              |  |
| <b>Details/Results extracted from source of evidence</b> (in relation to the concept of the scoping review) |  |
| E.g. Quality of Life Domains assessed                                                                       |  |
| E.g. Number of items in tool                                                                                |  |
| E.g. details of psychometric validation of tool                                                             |  |
